# Supplementary material for: Patient preferences for treatments in hormone receptor-positive/HER2-negative metastatic breast cancer in Italy: a discrete choice experiment study
Source: Springer Nature journal article supplement (doi:10.1186/s12885-025-14308-4), 2025-05-22
Supplement: MOESM2 [file 12885_2025_14308_MOESM2_ESM.pdf]

Figure S1

A

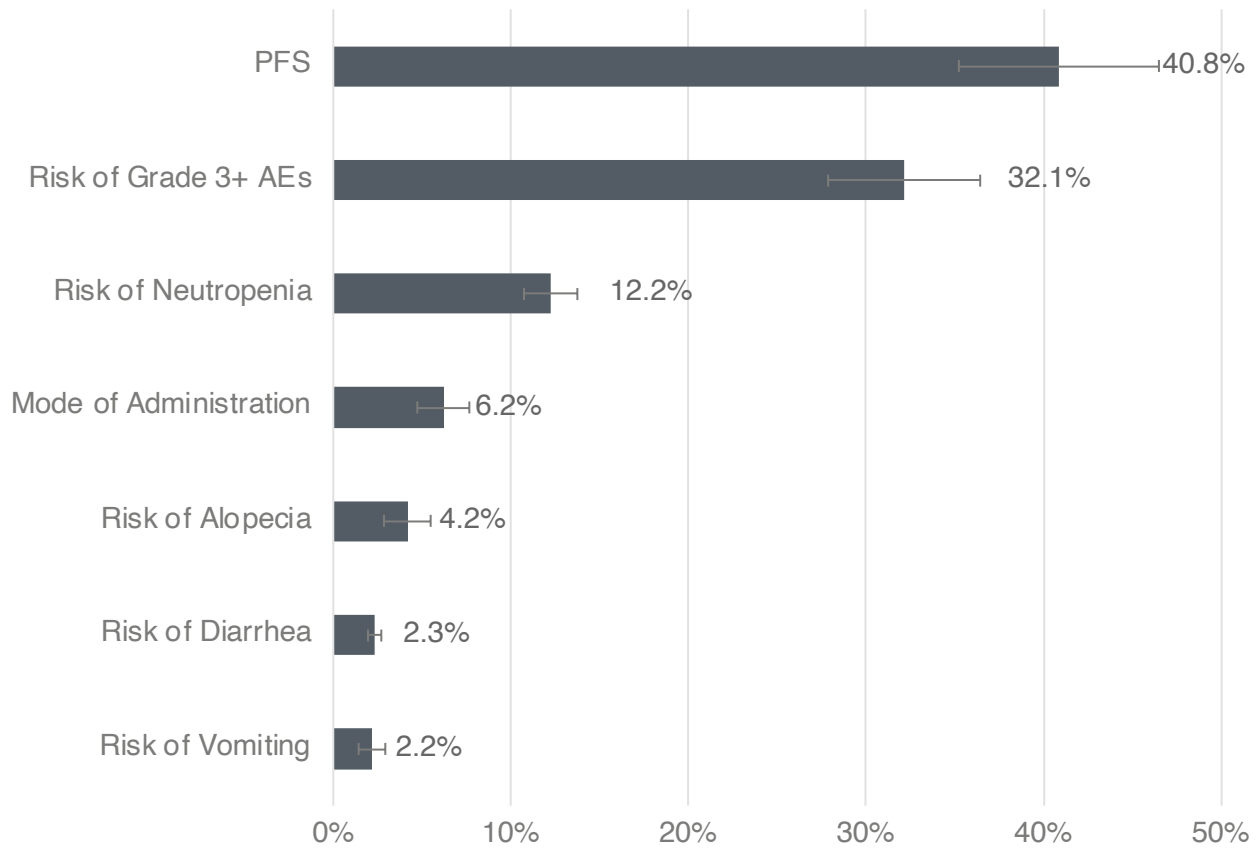

Relative importance percentages add up to 100% across attributes for each respondent  
Bars represent the 95% CI for each attribute

B

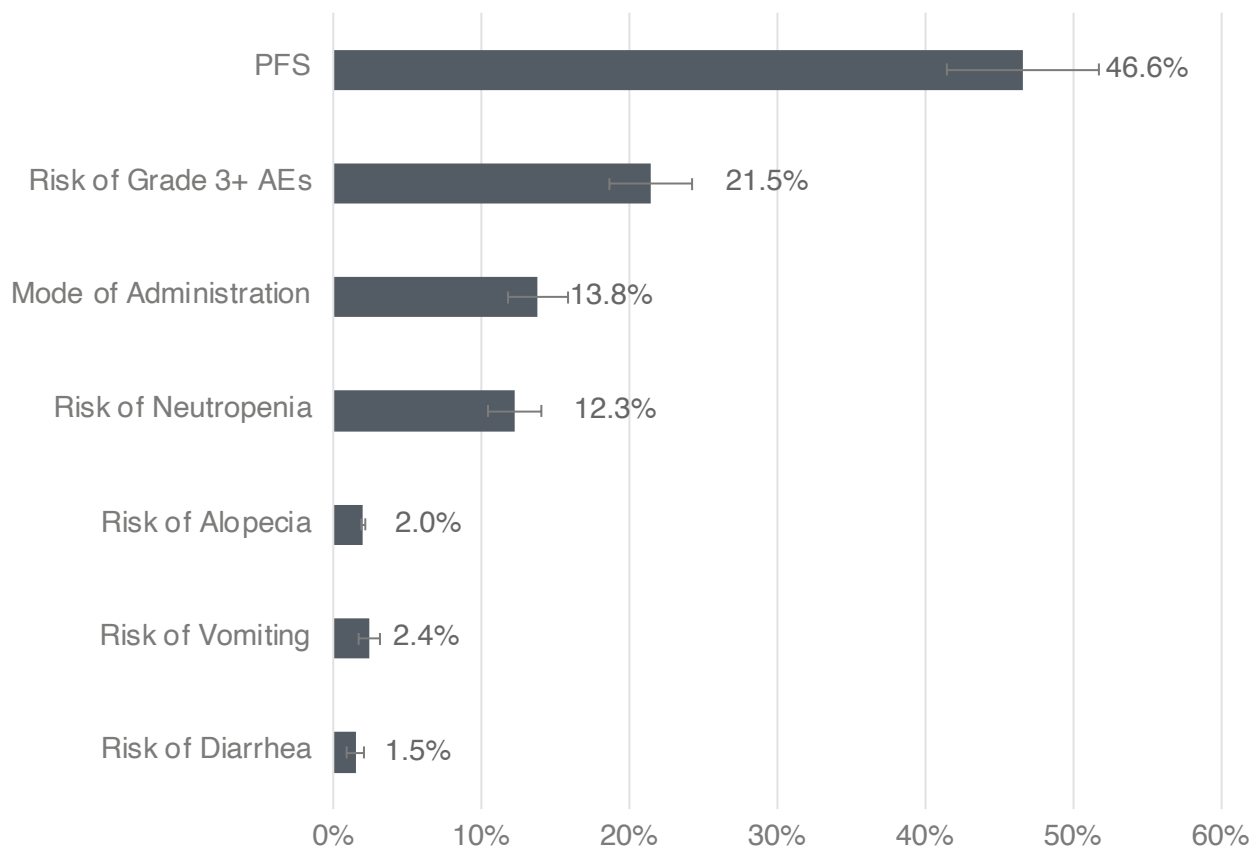

Relative importance percentages add up to 100% across attributes for each respondent  
Bars represent the 95% CI for each attribute
